# Supplementary material for: Political institutions and health expenditure
Source: Springer Nature journal article supplement (doi:10.1007/s10797-020-09648-9), 2021-03-09
Supplement: MOESM1 [file 18945734]

# Appendix II: Electronic supplementary material

## Results for the Bjornskov and Rode (2019) democracy measure

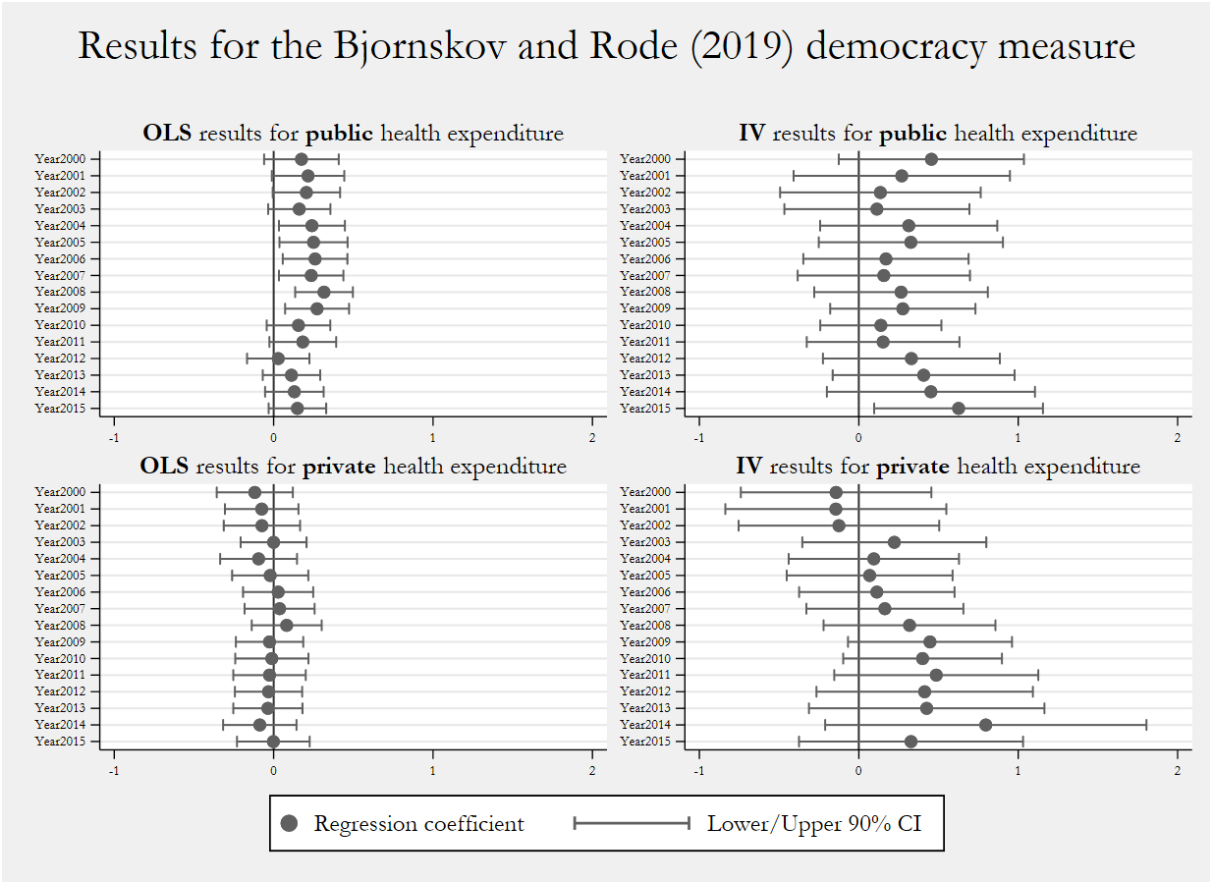

FIGURE 6: POOLED OLS AND IV ESTIMATES 2000-2015 (1/4)

## Results for the Polity IV index

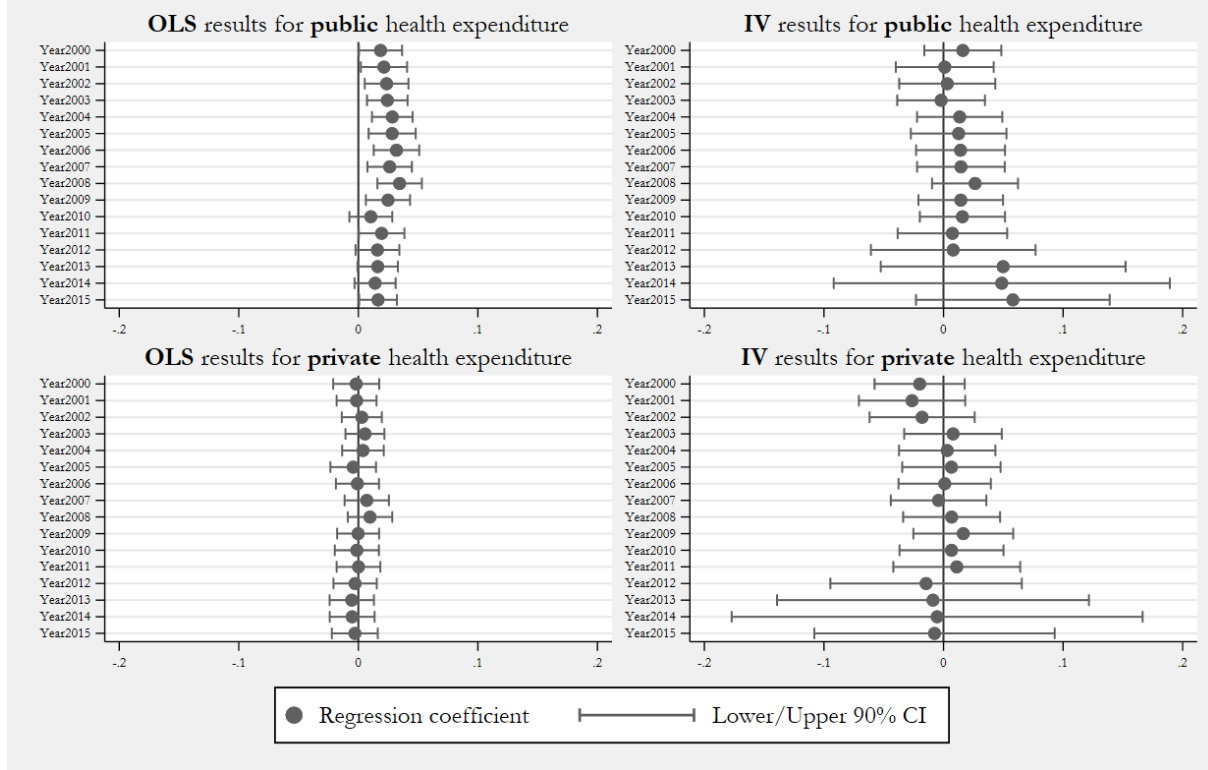

FIGURE 7: POOLED OLS AND IV ESTIMATES 2000-2015 (2/4)

## Results for the Dichotomous Machine Learning Index (DSVMDI)

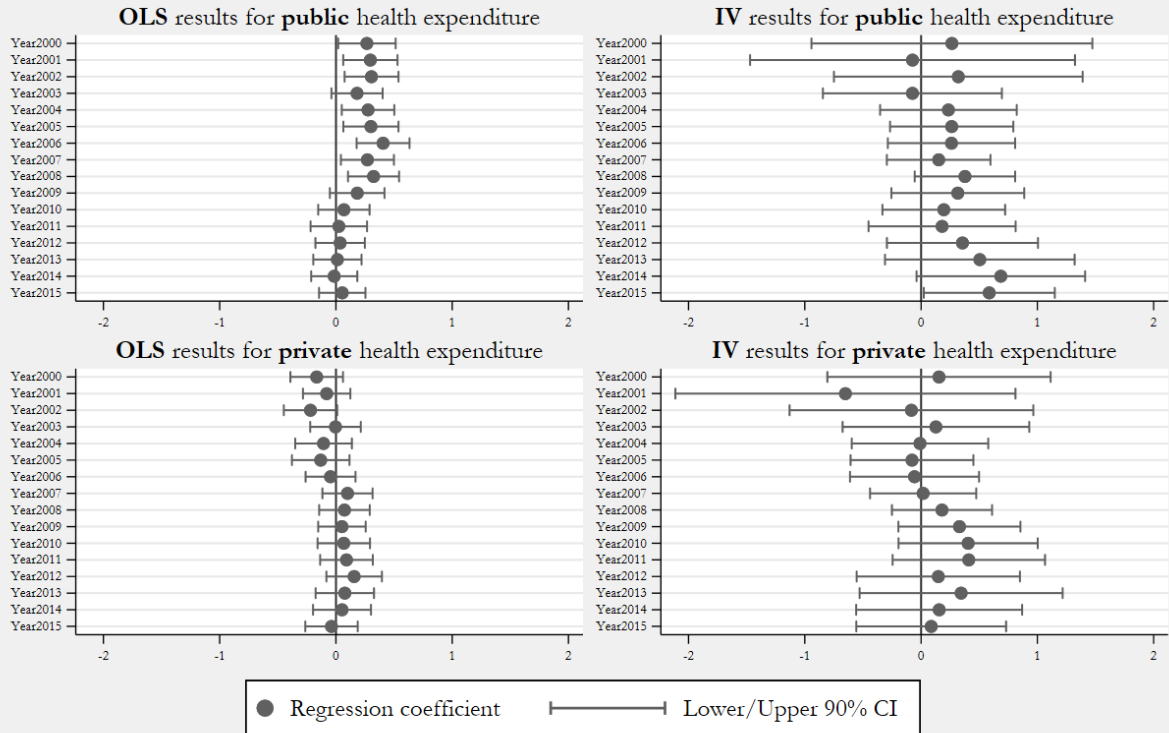

FIGURE 8: POOLED OLS AND IV ESTIMATES 2000-2015 (3/4)

## Results for the Continuous Machine Learning Index (CSVMDI)

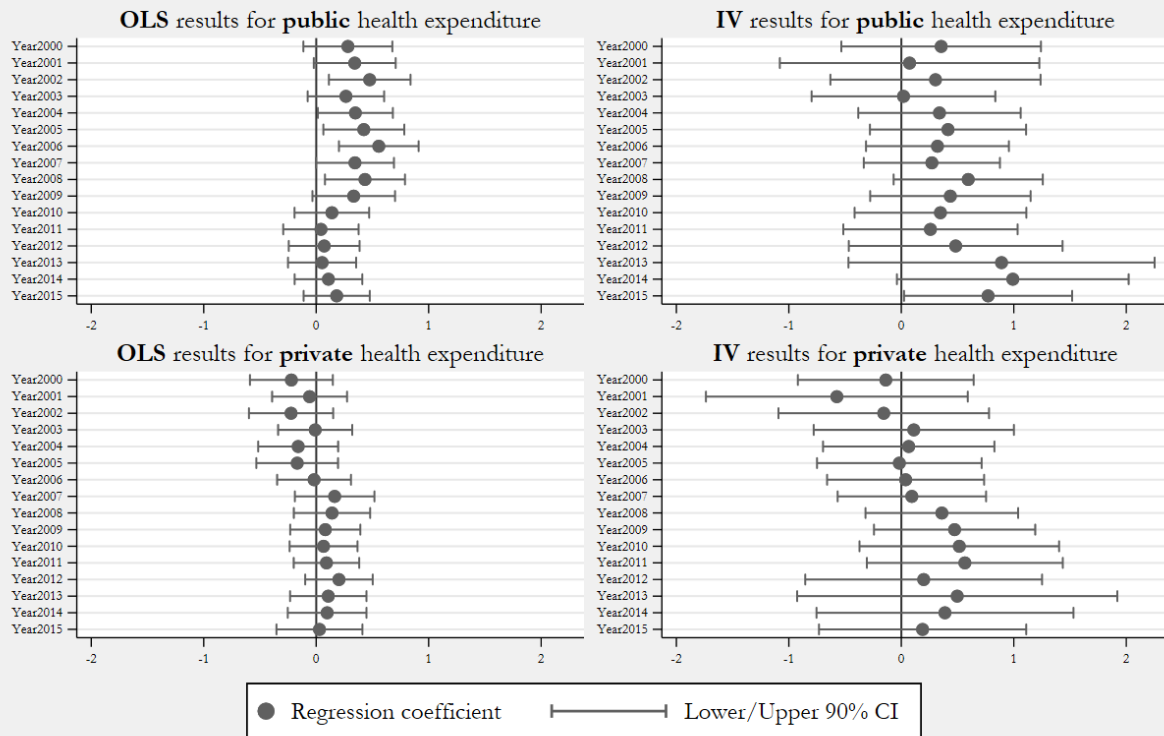

FIGURE 9: POOLED OLS AND IV ESTIMATES 2000-2015 (4/4)

Notes: All models of figures 6-9 include country and year fixed effects, baseline controls and standard errors robust to heteroskedasticity.

## Results for the Bjornskov and Rode (2019) democracy measure

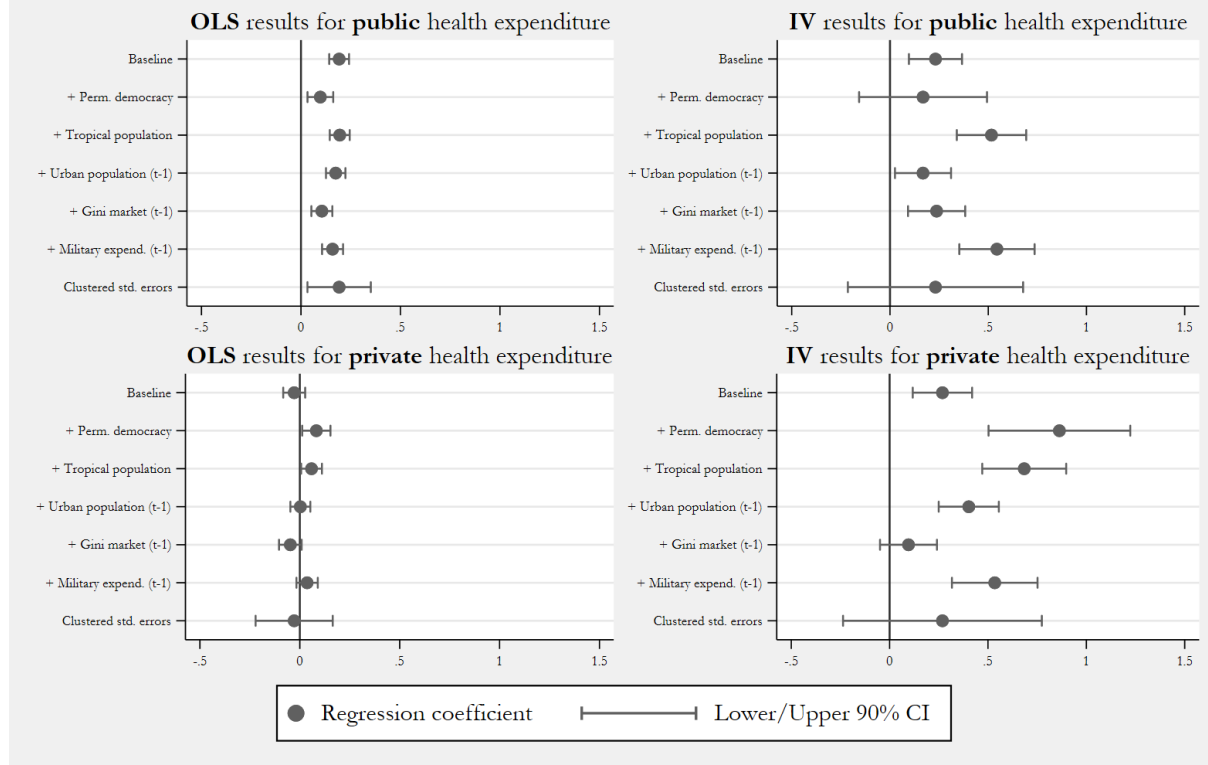

FIGURE 10: POOLED OLS AND IV ESTIMATES 2000-2015: ADDITIONAL CONTROLS (1/2)

Notes: Urban population share and military expenditure (as % of GDP) are expressed in their natural logarithm.

## Results for the Dichotomous Machine Learning Index (DSVMDI)

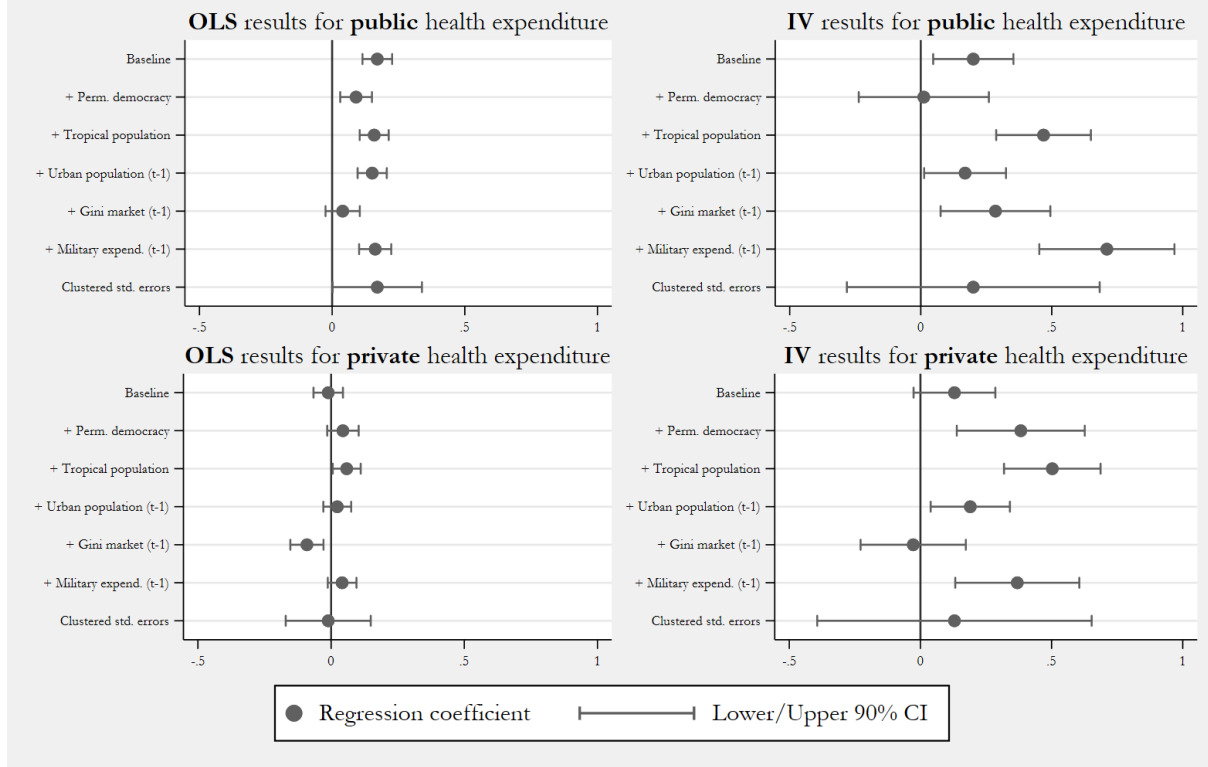

FIGURE 11: POOLED OLS AND IV ESTIMATES 2000-2015: ADDITIONAL CONTROLS (2/2)

Notes: Urban population share and military expenditure (as % of GDP) are expressed in their natural logarithm.

TABLE 8: DEMOCRATIC TRANSITION (DSVMDI) – EVENT STUDY RESULTS FOR GOVERNMENT HEALTH EXPENDITURE

| Gov. health exp.<br>(% of GDP) <sup>a</sup> | (1)                | (2)                | (3)               | (4)                | (5)                | (6)                |
|---------------------------------------------|--------------------|--------------------|-------------------|--------------------|--------------------|--------------------|
| Year: $\leq t-8$                            | -0.154<br>(0.10)   | -0.168<br>(0.12)   | -0.101<br>(0.11)  | -0.159<br>(0.12)   | -0.170<br>(0.13)   | -0.228*<br>(0.14)  |
| Year: $t-7$                                 | -0.086<br>(0.12)   | -0.100<br>(0.13)   | -0.052<br>(0.12)  | -0.089<br>(0.13)   | -0.093<br>(0.14)   | -0.117<br>(0.14)   |
| Year: $t-6$                                 | -0.214<br>(0.18)   | -0.229<br>(0.18)   | -0.167<br>(0.18)  | -0.213<br>(0.18)   | -0.191<br>(0.17)   | -0.205<br>(0.18)   |
| Year: $t-5$                                 | -0.134<br>(0.10)   | -0.145<br>(0.10)   | -0.101<br>(0.10)  | -0.140<br>(0.11)   | -0.120<br>(0.10)   | -0.132<br>(0.10)   |
| Year: $t-4$                                 | -0.155*<br>(0.09)  | -0.163<br>(0.10)   | -0.136<br>(0.10)  | -0.159<br>(0.10)   | -0.134<br>(0.10)   | -0.140<br>(0.10)   |
| Year: $t-3$                                 | -0.134<br>(0.09)   | -0.142<br>(0.09)   | -0.125<br>(0.09)  | -0.142<br>(0.09)   | -0.115<br>(0.09)   | -0.118<br>(0.09)   |
| Year: $t-2$                                 | -0.009<br>(0.05)   | -0.023<br>(0.05)   | -0.004<br>(0.05)  | -0.024<br>(0.05)   | -0.021<br>(0.05)   | -0.031<br>(0.05)   |
| Year: $t-1$                                 | 0.000              | 0.000              | 0.000             | 0.000              | 0.000              | 0.000              |
| Year: $t$                                   | 0.078**<br>(0.04)  | 0.076*<br>(0.04)   | 0.069*<br>(0.04)  | 0.076**<br>(0.04)  | 0.081*<br>(0.04)   | 0.088**<br>(0.04)  |
| Year: $t+1$                                 | 0.108*<br>(0.06)   | 0.102*<br>(0.06)   | 0.085<br>(0.06)   | 0.096*<br>(0.06)   | 0.114*<br>(0.06)   | 0.115*<br>(0.06)   |
| Year: $t+2$                                 | 0.225***<br>(0.08) | 0.221***<br>(0.08) | 0.203**<br>(0.08) | 0.217***<br>(0.08) | 0.259***<br>(0.09) | 0.266***<br>(0.09) |
| Year: $t+3$                                 | 0.186**<br>(0.09)  | 0.175*<br>(0.09)   | 0.161*<br>(0.09)  | 0.173*<br>(0.09)   | 0.214**<br>(0.10)  | 0.224**<br>(0.10)  |
| Year: $t+4$                                 | 0.096<br>(0.08)    | 0.084<br>(0.08)    | 0.058<br>(0.09)   | 0.078<br>(0.08)    | 0.142*<br>(0.08)   | 0.151*<br>(0.09)   |
| Year: $t+5$                                 | 0.077<br>(0.10)    | 0.056<br>(0.10)    | 0.038<br>(0.10)   | 0.056<br>(0.10)    | 0.127<br>(0.11)    | 0.145<br>(0.11)    |
| Year: $t+6$                                 | 0.090<br>(0.15)    | 0.065<br>(0.15)    | 0.044<br>(0.15)   | 0.064<br>(0.15)    | 0.139<br>(0.16)    | 0.145<br>(0.16)    |
| Year: $t+7$                                 | 0.149<br>(0.13)    | 0.117<br>(0.13)    | 0.066<br>(0.13)   | 0.093<br>(0.13)    | 0.223*<br>(0.13)   | 0.195<br>(0.13)    |
| Year: $\geq t+8$                            | 0.099<br>(0.17)    | 0.085<br>(0.17)    | 0.001<br>(0.18)   | 0.065<br>(0.17)    | 0.241<br>(0.19)    | 0.228<br>(0.20)    |
| Controls                                    | no                 | yes                | no                | yes                | yes                | yes                |
| Country FE                                  | yes                | yes                | yes               | yes                | yes                | yes                |
| Year FE                                     | no                 | no                 | yes               | yes                | no                 | yes                |
| Observations                                | 2223               | 2216               | 2223              | 2216               | 1137               | 1137               |
| R <sup>2</sup> (within)                     | 0.034              | 0.085              | 0.060             | 0.094              | 0.088              | 0.166              |

Notes: Standard errors in parentheses. \*, \*\*, and \*\*\* indicate significance at the 10, 5, and 1% significance levels. All regressions apply standard errors clustered at the country level. Columns (5) and (6) use a reduced sample without permanent democracies. Controls refer to the baseline controls following equation (6).

TABLE 9: DEMOCRATIC TRANSITION (DSVMDI) – EVENT STUDY RESULTS FOR PRIVATE HEALTH EXPENDITURE

| Priv. health exp.<br>(% of GDP) <sup>a</sup> | (1)              | (2)               | (3)              | (4)               | (5)               | (6)              |
|----------------------------------------------|------------------|-------------------|------------------|-------------------|-------------------|------------------|
| Year: ≤ t-8                                  | -0.054<br>(0.09) | -0.126<br>(0.10)  | -0.063<br>(0.09) | -0.098<br>(0.10)  | -0.127<br>(0.10)  | -0.096<br>(0.11) |
| Year: t-7                                    | 0.012<br>(0.07)  | -0.039<br>(0.07)  | 0.000<br>(0.07)  | -0.028<br>(0.07)  | -0.041<br>(0.07)  | -0.027<br>(0.07) |
| Year: t-6                                    | -0.018<br>(0.07) | -0.056<br>(0.06)  | -0.013<br>(0.06) | -0.038<br>(0.06)  | -0.061<br>(0.07)  | -0.045<br>(0.07) |
| Year: t-5                                    | 0.054<br>(0.06)  | 0.015<br>(0.06)   | 0.051<br>(0.06)  | 0.024<br>(0.06)   | 0.011<br>(0.06)   | 0.014<br>(0.06)  |
| Year: t-4                                    | 0.037<br>(0.06)  | 0.011<br>(0.06)   | 0.036<br>(0.06)  | 0.019<br>(0.06)   | 0.011<br>(0.07)   | 0.017<br>(0.06)  |
| Year: t-3                                    | 0.044<br>(0.07)  | 0.024<br>(0.06)   | 0.041<br>(0.07)  | 0.028<br>(0.06)   | 0.023<br>(0.07)   | 0.025<br>(0.06)  |
| Year: t-2                                    | -0.009<br>(0.04) | -0.027<br>(0.04)  | -0.012<br>(0.04) | -0.026<br>(0.04)  | -0.026<br>(0.04)  | -0.031<br>(0.04) |
| Year: t-1                                    | 0.000            | 0.000             | 0.000            | 0.000             | 0.000             | 0.000            |
| Year: t                                      | 0.020<br>(0.02)  | 0.025<br>(0.02)   | 0.023<br>(0.02)  | 0.027<br>(0.02)   | 0.029<br>(0.02)   | 0.027<br>(0.02)  |
| Year: t+1                                    | 0.009<br>(0.03)  | 0.017<br>(0.03)   | 0.007<br>(0.03)  | 0.013<br>(0.03)   | 0.023<br>(0.04)   | 0.009<br>(0.04)  |
| Year: t+2                                    | 0.048<br>(0.05)  | 0.064<br>(0.05)   | 0.051<br>(0.05)  | 0.059<br>(0.05)   | 0.059<br>(0.05)   | 0.051<br>(0.06)  |
| Year: t+3                                    | 0.096*<br>(0.05) | 0.111**<br>(0.05) | 0.099*<br>(0.05) | 0.106**<br>(0.05) | 0.112**<br>(0.06) | 0.103*<br>(0.06) |
| Year: t+4                                    | 0.049<br>(0.05)  | 0.067<br>(0.05)   | 0.047<br>(0.05)  | 0.059<br>(0.05)   | 0.067<br>(0.06)   | 0.047<br>(0.06)  |
| Year: t+5                                    | 0.024<br>(0.06)  | 0.043<br>(0.06)   | 0.037<br>(0.06)  | 0.046<br>(0.06)   | 0.037<br>(0.07)   | 0.035<br>(0.07)  |
| Year: t+6                                    | 0.017<br>(0.06)  | 0.038<br>(0.06)   | 0.035<br>(0.07)  | 0.043<br>(0.06)   | 0.036<br>(0.07)   | 0.030<br>(0.07)  |
| Year: t+7                                    | 0.037<br>(0.07)  | 0.055<br>(0.07)   | 0.023<br>(0.08)  | 0.037<br>(0.08)   | 0.052<br>(0.09)   | 0.016<br>(0.09)  |
| Year: ≥ t+8                                  | -0.016<br>(0.07) | 0.030<br>(0.07)   | -0.014<br>(0.08) | 0.023<br>(0.08)   | 0.047<br>(0.09)   | 0.013<br>(0.10)  |
| Controls                                     | no               | yes               | no               | yes               | yes               | yes              |
| Country FE                                   | yes              | yes               | yes              | yes               | yes               | yes              |
| Year FE                                      | no               | no                | yes              | yes               | no                | yes              |
| Observations                                 | 2223             | 2216              | 2223             | 2216              | 1137              | 1137             |
| R <sup>2</sup> (within)                      | 0.006            | 0.055             | 0.019            | 0.068             | 0.083             | 0.103            |

Notes: Standard errors in parentheses. \*, \*\*, and \*\*\* indicate significance at the 10, 5, and 1% significance levels. All regressions apply standard errors clustered at the country level. Columns (5) and (6) use a reduced sample without permanent democracies. Controls refer to the baseline controls following equation (6).



TABLE 10: AUTOCRATIC TRANSITION (DSVMDI) – EVENT STUDY RESULTS FOR GOVERNMENT HEALTH EXPENDITURE

| Gov. health exp.<br>(% of GDP) <sup>a</sup> | (1)                | (2)                | (3)                 | (4)                 | (5)                | (6)                 |
|---------------------------------------------|--------------------|--------------------|---------------------|---------------------|--------------------|---------------------|
| Year: ≤ t-8                                 | 0.272<br>(0.17)    | 0.307*<br>(0.16)   | 0.385**<br>(0.17)   | 0.332**<br>(0.17)   | 0.407**<br>(0.19)  | 0.394**<br>(0.19)   |
| Year: t-7                                   | 0.279*<br>(0.15)   | 0.334**<br>(0.15)  | 0.362**<br>(0.15)   | 0.352**<br>(0.15)   | 0.417**<br>(0.16)  | 0.434***<br>(0.16)  |
| Year: t-6                                   | 0.197<br>(0.13)    | 0.251**<br>(0.12)  | 0.267**<br>(0.13)   | 0.266**<br>(0.12)   | 0.301**<br>(0.13)  | 0.320**<br>(0.13)   |
| Year: t-5                                   | 0.111<br>(0.10)    | 0.152<br>(0.10)    | 0.163*<br>(0.10)    | 0.164*<br>(0.09)    | 0.174*<br>(0.10)   | 0.199**<br>(0.10)   |
| Year: t-4                                   | 0.100<br>(0.09)    | 0.137<br>(0.09)    | 0.150*<br>(0.09)    | 0.158*<br>(0.09)    | 0.148<br>(0.09)    | 0.189**<br>(0.09)   |
| Year: t-3                                   | 0.126<br>(0.10)    | 0.142<br>(0.10)    | 0.171*<br>(0.10)    | 0.166*<br>(0.10)    | 0.150<br>(0.10)    | 0.181*<br>(0.10)    |
| Year: t-2                                   | -0.009<br>(0.07)   | 0.001<br>(0.06)    | 0.017<br>(0.07)     | 0.016<br>(0.06)     | -0.001<br>(0.07)   | 0.014<br>(0.07)     |
| Year: t-1                                   | 0.000              | 0.000              | 0.000               | 0.000               | 0.000              | 0.000               |
| Year: t                                     | -0.015<br>(0.06)   | -0.021<br>(0.06)   | -0.036<br>(0.06)    | -0.031<br>(0.06)    | -0.029<br>(0.06)   | -0.040<br>(0.06)    |
| Year: t+1                                   | -0.001<br>(0.11)   | -0.010<br>(0.11)   | -0.033<br>(0.12)    | -0.025<br>(0.11)    | -0.007<br>(0.11)   | -0.020<br>(0.12)    |
| Year: t+2                                   | -0.231<br>(0.15)   | -0.256*<br>(0.15)  | -0.279*<br>(0.15)   | -0.277*<br>(0.15)   | -0.260*<br>(0.15)  | -0.273*<br>(0.15)   |
| Year: t+3                                   | -0.165**<br>(0.08) | -0.199**<br>(0.08) | -0.241***<br>(0.08) | -0.234***<br>(0.07) | -0.206**<br>(0.09) | -0.246***<br>(0.08) |
| Year: t+4                                   | -0.164*<br>(0.09)  | -0.207**<br>(0.09) | -0.253***<br>(0.09) | -0.242***<br>(0.09) | -0.209**<br>(0.10) | -0.245**<br>(0.10)  |
| Year: t+5                                   | -0.193<br>(0.18)   | -0.245<br>(0.18)   | -0.296<br>(0.19)    | -0.287<br>(0.18)    | -0.224<br>(0.19)   | -0.257<br>(0.19)    |
| Year: t+6                                   | -0.140<br>(0.12)   | -0.195*<br>(0.12)  | -0.261*<br>(0.14)   | -0.244*<br>(0.13)   | -0.183<br>(0.12)   | -0.233*<br>(0.14)   |
| Year: t+7                                   | -0.135<br>(0.13)   | -0.200<br>(0.13)   | -0.292*<br>(0.16)   | -0.273*<br>(0.15)   | -0.185<br>(0.13)   | -0.268<br>(0.16)    |
| Year: ≥ t+8                                 | 0.071<br>(0.09)    | 0.003<br>(0.09)    | -0.330<br>(0.20)    | -0.281<br>(0.19)    | -0.003<br>(0.10)   | -0.312<br>(0.19)    |
| Controls                                    | no                 | yes                | no                  | yes                 | yes                | yes                 |
| Country FE                                  | yes                | yes                | yes                 | yes                 | yes                | yes                 |
| Year FE                                     | no                 | no                 | yes                 | yes                 | no                 | yes                 |
| Observations                                | 2223               | 2216               | 2223                | 2216                | 1137               | 1137                |
| R <sup>2</sup> (within)                     | 0.030              | 0.084              | 0.079               | 0.102               | 0.088              | 0.122               |

Notes: Standard errors in parentheses. \*, \*\*, and \*\*\* indicate significance at the 10, 5, and 1% significance levels. All regressions apply standard errors clustered at the country level. Columns (5) and (6) use a reduced sample without permanent democracies. Controls refer to the baseline controls following equation (6).

TABLE 11: AUTOCRATIC TRANSITION (DSVMDI) – EVENT STUDY RESULTS FOR PRIVATE HEALTH EXPENDITURE

| Priv. health exp.<br>(% of GDP) <sup>a</sup> | (1)               | (2)               | (3)               | (4)               | (5)                | (6)                |
|----------------------------------------------|-------------------|-------------------|-------------------|-------------------|--------------------|--------------------|
| Year: $\leq t-8$                             | 0.060<br>(0.07)   | 0.007<br>(0.07)   | 0.059<br>(0.07)   | 0.024<br>(0.07)   | 0.018<br>(0.08)    | 0.038<br>(0.08)    |
| Year: $t-7$                                  | 0.050<br>(0.07)   | 0.031<br>(0.07)   | 0.043<br>(0.07)   | 0.035<br>(0.07)   | 0.048<br>(0.07)    | 0.056<br>(0.07)    |
| Year: $t-6$                                  | 0.124**<br>(0.05) | 0.115**<br>(0.05) | 0.115**<br>(0.05) | 0.113**<br>(0.05) | 0.135***<br>(0.05) | 0.141***<br>(0.05) |
| Year: $t-5$                                  | 0.080<br>(0.05)   | 0.077*<br>(0.05)  | 0.069<br>(0.05)   | 0.068<br>(0.04)   | 0.085*<br>(0.04)   | 0.079*<br>(0.04)   |
| Year: $t-4$                                  | 0.075*<br>(0.04)  | 0.079**<br>(0.04) | 0.072*<br>(0.04)  | 0.076**<br>(0.04) | 0.090**<br>(0.04)  | 0.089**<br>(0.04)  |
| Year: $t-3$                                  | 0.060*<br>(0.03)  | 0.055*<br>(0.03)  | 0.063**<br>(0.03) | 0.062**<br>(0.03) | 0.058**<br>(0.03)  | 0.069**<br>(0.03)  |
| Year: $t-2$                                  | 0.042*<br>(0.02)  | 0.040**<br>(0.02) | 0.044*<br>(0.02)  | 0.045**<br>(0.02) | 0.043**<br>(0.02)  | 0.051**<br>(0.02)  |
| Year: $t-1$                                  | 0.000             | 0.000             | 0.000             | 0.000             | 0.000              | 0.000              |
| Year: $t$                                    | -0.001<br>(0.02)  | 0.003<br>(0.02)   | -0.009<br>(0.02)  | -0.007<br>(0.02)  | 0.008<br>(0.02)    | -0.004<br>(0.02)   |
| Year: $t+1$                                  | 0.004<br>(0.05)   | 0.011<br>(0.05)   | -0.001<br>(0.05)  | 0.003<br>(0.05)   | 0.022<br>(0.05)    | 0.010<br>(0.05)    |
| Year: $t+2$                                  | -0.057<br>(0.06)  | -0.053<br>(0.06)  | -0.052<br>(0.06)  | -0.054<br>(0.06)  | -0.047<br>(0.06)   | -0.049<br>(0.06)   |
| Year: $t+3$                                  | -0.033<br>(0.09)  | -0.025<br>(0.08)  | -0.040<br>(0.09)  | -0.033<br>(0.08)  | -0.018<br>(0.08)   | -0.031<br>(0.08)   |
| Year: $t+4$                                  | -0.025<br>(0.12)  | -0.011<br>(0.11)  | -0.026<br>(0.13)  | -0.011<br>(0.12)  | -0.002<br>(0.11)   | -0.004<br>(0.12)   |
| Year: $t+5$                                  | 0.103<br>(0.08)   | 0.116<br>(0.07)   | 0.114<br>(0.09)   | 0.120<br>(0.08)   | 0.126<br>(0.08)    | 0.123<br>(0.09)    |
| Year: $t+6$                                  | 0.105<br>(0.09)   | 0.121<br>(0.08)   | 0.112<br>(0.10)   | 0.129<br>(0.09)   | 0.134<br>(0.08)    | 0.137<br>(0.09)    |
| Year: $t+7$                                  | 0.125<br>(0.12)   | 0.145<br>(0.10)   | 0.133<br>(0.13)   | 0.153<br>(0.11)   | 0.161<br>(0.10)    | 0.167<br>(0.11)    |
| Year: $\geq t+8$                             | 0.094<br>(0.06)   | 0.107*<br>(0.06)  | 0.085<br>(0.15)   | 0.122<br>(0.13)   | 0.137**<br>(0.06)  | 0.138<br>(0.13)    |
| Controls                                     | no                | yes               | no                | yes               | yes                | yes                |
| Country FE                                   | yes               | yes               | yes               | yes               | yes                | yes                |
| Year FE                                      | no                | no                | yes               | yes               | no                 | yes                |
| Observations                                 | 2223              | 2216              | 2223              | 2216              | 1137               | 1137               |
| R <sup>2</sup> (within)                      | 0.011             | 0.056             | 0.022             | 0.070             | 0.089              | 0.108              |

Notes: Standard errors in parentheses. \*, \*\*, and \*\*\* indicate significance at the 10, 5, and 1% significance levels. All regressions apply standard errors clustered at the country level. Columns (5) and (6) use a reduced sample without permanent democracies. Controls refer to the baseline controls following equation (6).

**TABLE 12: ROBUSTNESS TEST – POOLED OLS AND IV RESULTS FOR GOVERNMENT HEALTH EXPENDITURE, EXCLUDING HIGH-INCOME COUNTRIES**

| Gov. health exp. (% of GDP) <sup>a</sup>                               | (1)                  | (2)                  | (3)                  | (4)                  |
|------------------------------------------------------------------------|----------------------|----------------------|----------------------|----------------------|
| <b>Panel A</b>                                                         |                      |                      |                      |                      |
| Democracy (t-1)                                                        | 0.150***<br>(0.029)  |                      |                      |                      |
| Polity IV (t-1)                                                        |                      | 0.017***<br>(0.003)  |                      |                      |
| DSVMDI (t-1)                                                           |                      |                      | 0.126***<br>(0.032)  |                      |
| CSVMDI (t-1)                                                           |                      |                      |                      | 0.189***<br>(0.051)  |
| GDP per capita (t-1) <sup>a</sup>                                      | 0.036<br>(0.024)     | 0.047**<br>(0.023)   | 0.034<br>(0.024)     | 0.038<br>(0.024)     |
| Population (t-1) <sup>a</sup>                                          | -0.127***<br>(0.010) | -0.118***<br>(0.011) | -0.126***<br>(0.010) | -0.125***<br>(0.010) |
| Population ages 65 and above (% of total) (t-1) <sup>a</sup>           | -0.214***<br>(0.076) | -0.234***<br>(0.076) | -0.210***<br>(0.076) | -0.228***<br>(0.078) |
| Population ages 0-14 (% of total) (t-1) <sup>a</sup>                   | -0.700***<br>(0.123) | -0.778***<br>(0.124) | -0.727***<br>(0.124) | -0.745***<br>(0.126) |
| Globalization (t-1)                                                    | 0.020***<br>(0.002)  | 0.017***<br>(0.002)  | 0.020***<br>(0.002)  | 0.020***<br>(0.002)  |
| Constant                                                               | 4.045***<br>(0.583)  | 4.307***<br>(0.587)  | 4.136***<br>(0.591)  | 4.182***<br>(0.599)  |
| Observations                                                           | 1,606                | 1,600                | 1,606                | 1,606                |
| Countries                                                              | 106                  | 106                  | 106                  | 106                  |
| R <sup>2</sup>                                                         | 0.344                | 0.348                | 0.340                | 0.340                |
| <b>Panel B: Two-stage-least-squares estimates (controls not shown)</b> |                      |                      |                      |                      |
| Democracy (t-1)                                                        | 0.151**<br>(0.075)   |                      |                      |                      |
| Polity IV (t-1)                                                        |                      | -0.000<br>(0.007)    |                      |                      |
| DSVMDI (t-1)                                                           |                      |                      | 0.170*<br>(0.095)    |                      |
| CSVMDI (t-1)                                                           |                      |                      |                      | 0.247**<br>(0.122)   |
| <b>Panel C: First-stage estimates (excluded instruments only)</b>      |                      |                      |                      |                      |
| Jackknifed democracy measure                                           | 0.754***<br>(0.051)  | 0.643***<br>(0.047)  | 0.565***<br>(0.050)  | 0.569***<br>(0.040)  |
| Control variables included                                             | yes                  | yes                  | yes                  | yes                  |
| Observations                                                           | 1,606                | 1,600                | 1,606                | 1,606                |
| Countries                                                              | 106                  | 106                  | 106                  | 106                  |
| R <sup>2</sup> (second-stage regression)                               | 0.344                | 0.333                | 0.340                | 0.339                |
| Kleibergen-Paap F-Statistic                                            | 220.56               | 184.13               | 127.98               | 203.51               |
| Stock-Yogo (10% rel. bias)                                             | 16.38                | 16.38                | 16.38                | 16.38                |

Notes: Pooled OLS model. Standard errors in parentheses. \*, \*\*, and \*\*\* indicate significance at the 10, 5, and 1% significance levels. All regressions apply standard errors robust to heteroskedasticity. <sup>a</sup> denotes variables which are expressed in their natural logarithm.

**TABLE 13: ROBUSTNESS TEST – POOLED OLS AND IV RESULTS FOR PRIVATE HEALTH EXPENDITURE, EXCLUDING HIGH-INCOME COUNTRIES**

| Priv. health exp. (% of GDP) <sup>a</sup>                              | (1)                  | (2)                  | (3)                  | (4)                  |
|------------------------------------------------------------------------|----------------------|----------------------|----------------------|----------------------|
| <b>Panel A</b>                                                         |                      |                      |                      |                      |
| Democracy (t-1)                                                        | -0.072**<br>(0.035)  |                      |                      |                      |
| Polity IV (t-1)                                                        |                      | -0.008***<br>(0.003) |                      |                      |
| DSVMDI (t-1)                                                           |                      |                      | -0.071*<br>(0.036)   |                      |
| CSVMDI (t-1)                                                           |                      |                      |                      | -0.127**<br>(0.056)  |
| GDP per capita (t-1) <sup>a</sup>                                      | -0.183***<br>(0.019) | -0.187***<br>(0.019) | -0.183***<br>(0.019) | -0.186***<br>(0.019) |
| Population (t-1) <sup>a</sup>                                          | 0.026**<br>(0.011)   | 0.021**<br>(0.010)   | 0.025**<br>(0.011)   | 0.024**<br>(0.011)   |
| Population ages 65 and above (% of total) (t-1) <sup>a</sup>           | 0.325***<br>(0.089)  | 0.326***<br>(0.088)  | 0.325***<br>(0.089)  | 0.341***<br>(0.091)  |
| Population ages 0-14 (% of total) (t-1) <sup>a</sup>                   | 0.396***<br>(0.149)  | 0.422***<br>(0.149)  | 0.414***<br>(0.151)  | 0.432***<br>(0.153)  |
| Globalization (t-1)                                                    | 0.016***<br>(0.002)  | 0.017***<br>(0.002)  | 0.016***<br>(0.002)  | 0.017***<br>(0.002)  |
| Constant                                                               | -0.905<br>(0.746)    | -0.970<br>(0.747)    | -0.967<br>(0.753)    | -1.021<br>(0.759)    |
| Observations                                                           | 1,606                | 1,600                | 1,606                | 1,606                |
| Countries                                                              | 106                  | 106                  | 106                  | 106                  |
| R <sup>2</sup>                                                         | 0.083                | 0.082                | 0.083                | 0.084                |
| <b>Panel B: Two-stage-least-squares estimates (controls not shown)</b> |                      |                      |                      |                      |
| Democracy (t-1)                                                        | 0.080<br>(0.078)     |                      |                      |                      |
| Polity IV (t-1)                                                        |                      | -0.016**<br>(0.007)  |                      |                      |
| DSVMDI (t-1)                                                           |                      |                      | -0.107<br>(0.095)    |                      |
| CSVMDI (t-1)                                                           |                      |                      |                      | -0.105<br>(0.125)    |
| <b>Panel C: First-stage estimates (excluded instruments only)</b>      |                      |                      |                      |                      |
| Jackknifed democracy measure                                           | 0.754***<br>(0.051)  | 0.643***<br>(0.047)  | 0.565***<br>(0.050)  | 0.569***<br>(0.040)  |
| Control variables included                                             | yes                  | yes                  | yes                  | yes                  |
| Observations                                                           | 1,606                | 1,600                | 1,606                | 1,606                |
| Countries                                                              | 106                  | 106                  | 106                  | 106                  |
| R <sup>2</sup> (second-stage regression)                               | 0.070                | 0.078                | 0.082                | 0.084                |
| Kleibergen-Paap F-Statistic                                            | 220.56               | 184.13               | 127.98               | 203.51               |
| Stock-Yogo (10% rel. bias)                                             | 16.38                | 16.38                | 16.38                | 16.38                |

Notes: Pooled OLS model. Standard errors in parentheses. \*, \*\*, and \*\*\* indicate significance at the 10, 5, and 1% significance levels. All regressions apply standard errors robust to heteroskedasticity. <sup>a</sup> denotes variables which are expressed in their natural logarithm.

**TABLE 14: ROBUSTNESS TEST – PANEL FIXED-EFFECTS RESULTS FOR GOVERNMENT HEALTH EXPENDITURE, EXCLUDING HIGH-INCOME COUNTRIES**

| Gov. health exp. (% of GDP) <sup>a</sup>                     | (1)                 | (2)               | (3)                | (4)                |
|--------------------------------------------------------------|---------------------|-------------------|--------------------|--------------------|
| Democracy (t-1)                                              | 0.144***<br>(0.050) |                   |                    |                    |
| Polity IV (t-1)                                              |                     | 0.012<br>(0.008)  |                    |                    |
| DSVMDI (t-1)                                                 |                     |                   | 0.188**<br>(0.076) |                    |
| CSVMDI (t-1)                                                 |                     |                   |                    | 0.264**<br>(0.127) |
| GDP per capita (t-1) <sup>a</sup>                            | 0.025<br>(0.076)    | 0.035<br>(0.076)  | 0.046<br>(0.074)   | 0.033<br>(0.074)   |
| Population (t-1) <sup>a</sup>                                | -0.190<br>(0.385)   | -0.239<br>(0.390) | -0.267<br>(0.381)  | -0.260<br>(0.384)  |
| Population ages 65 and above (% of total) (t-1) <sup>a</sup> | 0.345<br>(0.320)    | 0.364<br>(0.327)  | 0.413<br>(0.323)   | 0.354<br>(0.328)   |
| Population ages 0-14 (% of total) (t-1) <sup>a</sup>         | -0.662<br>(0.596)   | -0.688<br>(0.603) | -0.690<br>(0.586)  | -0.738<br>(0.593)  |
| Globalization (t-1)                                          | 0.009<br>(0.008)    | 0.008<br>(0.008)  | 0.008<br>(0.008)   | 0.008<br>(0.008)   |
| Country Fixed Effects                                        | yes                 | yes               | yes                | yes                |
| Year Fixed Effects                                           | yes                 | yes               | yes                | yes                |
| Observations                                                 | 1,606               | 1,600             | 1,606              | 1,606              |
| Countries                                                    | 106                 | 106               | 106                | 106                |
| R <sup>2</sup> Overall                                       | 0.293               | 0.285             | 0.279              | 0.279              |
| R <sup>2</sup> Within                                        | 0.065               | 0.062             | 0.081              | 0.072              |
| R <sup>2</sup> Between                                       | 0.360               | 0.354             | 0.341              | 0.341              |

*Notes:* Standard errors in parentheses. \*, \*\*, and \*\*\* indicate significance at the 10, 5, and 1% significance level, respectively. All regressions apply standard errors clustered at the country level. <sup>a</sup> denotes variables which are expressed in their natural logarithm.

TABLE 15: ROBUSTNESS TEST – PANEL FIXED-EFFECTS RESULTS FOR PRIVATE HEALTH EXPENDITURE, EXCLUDING HIGH-INCOME COUNTRIES

| Priv. health exp. (% of GDP) <sup>a</sup>                    | (1)                 | (2)                 | (3)                 | (4)                 |
|--------------------------------------------------------------|---------------------|---------------------|---------------------|---------------------|
| Democracy (t-1)                                              | 0.040<br>(0.038)    |                     |                     |                     |
| Polity IV (t-1)                                              |                     | 0.002<br>(0.006)    |                     |                     |
| DSVMDI (t-1)                                                 |                     |                     | 0.049<br>(0.043)    |                     |
| CSVMDI (t-1)                                                 |                     |                     |                     | 0.079<br>(0.072)    |
| GDP per capita (t-1) <sup>a</sup>                            | -0.013<br>(0.057)   | -0.013<br>(0.057)   | -0.008<br>(0.057)   | -0.011<br>(0.057)   |
| Population (t-1) <sup>a</sup>                                | -0.741**<br>(0.326) | -0.745**<br>(0.329) | -0.761**<br>(0.327) | -0.762**<br>(0.328) |
| Population ages 65 and above (% of total) (t-1) <sup>a</sup> | 0.074<br>(0.316)    | 0.083<br>(0.313)    | 0.091<br>(0.317)    | 0.078<br>(0.317)    |
| Population ages 0-14 (% of total) (t-1) <sup>a</sup>         | 0.237<br>(0.403)    | 0.225<br>(0.402)    | 0.229<br>(0.397)    | 0.217<br>(0.396)    |
| Globalization (t-1)                                          | -0.003<br>(0.006)   | -0.003<br>(0.006)   | -0.003<br>(0.006)   | -0.003<br>(0.006)   |
| Country Fixed Effects                                        | yes                 | yes                 | yes                 | yes                 |
| Year Fixed Effects                                           | yes                 | yes                 | yes                 | yes                 |
| Observations                                                 | 1,606               | 1,600               | 1,606               | 1,606               |
| Countries                                                    | 106                 | 106                 | 106                 | 106                 |
| R <sup>2</sup> Overall                                       | 0.013               | 0.013               | 0.014               | 0.013               |
| R <sup>2</sup> Within                                        | 0.046               | 0.045               | 0.048               | 0.048               |
| R <sup>2</sup> Between                                       | 0.016               | 0.017               | 0.016               | 0.016               |

Notes: Standard errors in parentheses. \*, \*\*, and \*\*\* indicate significance at the 10, 5, and 1% significance level, respectively. All regressions apply standard errors clustered at the country level. <sup>a</sup> denotes variables which are expressed in their natural logarithm.
